# Supplementary material for: Stool Serology: Development of a Non-Invasive Immunological Method for the Detection of Enterovirus-Specific Antibodies in Congo Gorilla Faeces
Source: MDPI journal article supplement (doi:10.3390/microorganisms9040810), 2021-04-12
Supplement: s1 [file s1]

**Determination of IgA and IgG in gorilla faeces  
by three different protocols**

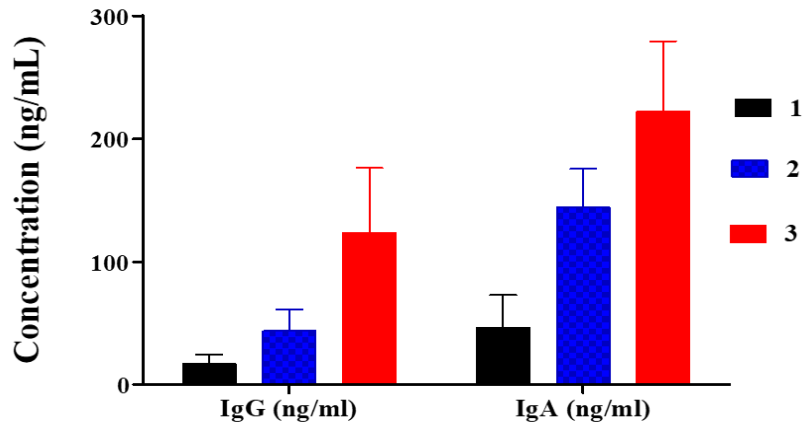

**Figure S1.** Quantification of immunoglobulins (IgG and IgA) in gorilla faeces with three different faecal treatment protocols. (1) Filtration of stool extract from 2 g of stools plus 2 ml of buffer; (2) Lyophilisation of the filtered extract, reconstituted in 500  $\mu$ l of buffer and then purification of IgG and IgA in the reconstituted extract with protein G and pectin M; (3) Lyophilisation of the filtered extract, reconstituted in a small volume of buffer (500  $\mu$ l) then concentrated by the Amicon® Ultra-1.
